23 **Abstract**

24

25 Population genetics studies on non-model organisms typically involve sampling few  
26 markers from multiple individuals. Next-generation sequencing approaches open up the  
27 possibility of sampling many more markers from fewer individuals to address the same  
28 questions. Here, we applied a target gene capture method to deep sequence ~1000  
29 independent autosomal regions of a non-model organism, the blacktip reef shark  
30 (*Carcharhinus melanopterus*). We devised a sampling scheme based on the predictions of  
31 theoretical studies of metapopulations to show that sampling few individuals, but many  
32 loci, can be extremely informative to reconstruct the evolutionary history of species. We  
33 collected data from a single deme (SID) from Northern Australia and from a scattered  
34 sampling representing various locations throughout the Indian Ocean (SCD). We explored  
35 the genealogical signature of population dynamics detected from both sampling schemes  
36 using an ABC algorithm. We then contrasted these results with those obtained by fitting the  
37 data to a non-equilibrium finite island model. Both approaches supported an  $Nm$  value ~40,  
38 consistent with philopatry in this species. Finally, we demonstrate through simulation that  
39 metapopulations exhibit greater resilience to recent changes in effective size compared to  
40 unstructured populations. We propose an empirical approach to detect recent bottlenecks  
41 based on our sampling scheme.

42

43

44

45 **Introduction**

46

47           Obtaining sufficient sequence information is no longer a limiting factor for  
48 deciphering the demographic and selective history of a species. Many studies now use  
49 population genomic approaches to shed light on evolutionary questions that also have  
50 practical applications for species conservation and management. While next-generation  
51 sequencing (NGS) techniques have made such approaches possible, studying non-model  
52 organisms without a reference genome remains a challenge. Thus far, whole-genome re-  
53 sequencing<sup>1</sup>, transcriptome analysis<sup>2</sup> and *de novo* restriction site associated DNA (RAD)  
54 sequencing<sup>3</sup> have been used to investigate the population dynamics of non-model  
55 organisms. All of these approaches have limitations: re-sequencing whole genomes of many  
56 individuals remains expensive and superfluous when reliable results can be obtained using  
57 a subset of the genome<sup>4</sup>. Generating transcriptome data sets suitable for investigating  
58 adaptive change can be complicated by the requirement for high quality RNA and sampling  
59 equivalent life stages and tissue types for all individuals<sup>5</sup>. Short sequence lengths, high rates  
60 of allelic dropout<sup>6</sup> and missing data<sup>7</sup>, as well as the vagaries of the bioinformatics pipeline  
61 that is used<sup>8</sup>, can influence estimates of genetic diversity obtained with RAD-seq  
62 approaches. Target gene capture approaches offer a promising alternative to these methods.  
63 They permit sequencing of pre-selected regions of the genome (see the review from<sup>9</sup>) that  
64 have been determined *a priori* to be informative for the research question and are generally  
65 effective across a range of sample types and qualities. This allows the generation of  
66 relatively unbiased, more complete datasets than can be obtained using RAD technologies,  
67 and at an affordable cost compared with whole-genome re-sequencing.

68           The population structure of the study organism is another factor that may complicate  
69   our ability to make robust demographic inferences from population genomic data. Previous  
70   work has shown that ignoring metapopulation structure can sometimes mislead  
71   interpretations of the demographic and evolutionary history of a species<sup>10-13</sup>. This is a  
72   problem because populations are rarely entirely isolated in nature but instead belong to a  
73   network of demes that exchange migrants at different rates. Despite these concerns, few  
74   studies have attempted to estimate demographic parameters under complex metapopulation  
75   models (see <sup>14</sup> and <sup>15</sup> for some exceptions). The predicted coalescent patterns that are  
76   associated with metapopulations sampled at different levels are of special interest. The gene  
77   genealogy of a metapopulation is characterized by the product of the effective population  
78   size  $N$  and the migration rate  $m$ <sup>16-19</sup>. The coalescent history of a sample of lineages can be  
79   divided into two phases: the *scattering* phase within each single deme and the *collecting*  
80   phase when each of the lineages comes from a different deme<sup>16,20</sup>. This separation of time  
81   scales holds true for several metapopulation models, including range expansions<sup>19</sup>.  
82   Contrasting the shape of the genealogy at different sampling levels (e.g. “single deme” vs.  
83   “scatter”, where each lineage comes from a different deme) indirectly provides information  
84   on the long term  $Nm$ <sup>18</sup>. It is therefore possible to make inferences about the evolutionary  
85   history of the metapopulation using relatively simple demographic models that investigate  
86   changes in effective population size across specific sampling schemes. A few individuals  
87   judiciously sampled from the range distribution of a species can be sufficient to uncover its  
88   demography, when enough loci are available for statistical inferences. Such an approach is  
89   now tenable with the large datasets that are being generated using NGS and has important

90 applications for the study of endangered animals, or of any organism for which specimens  
91 are not easily obtained.

92         Here, we demonstrate the use of such an approach to study the demographic history  
93 of a non-model organism, the blacktip reef shark (*Carcharhinus melanopterus*). These animals  
94 are highly philopatric and are often found on remote coral islands and atolls<sup>21,22</sup>. Their  
95 proclivity for philopatry and strong habitat preference for coral reefs predisposes them to  
96 exhibit a disjunct meta-population structure over their widespread distribution throughout  
97 the Indo-Pacific. We devised a two-layered sampling scheme based on the above theoretical  
98 considerations associated with metapopulations<sup>20</sup>: we collected individuals from a single  
99 deme from Northern Australia and from a scattered sampling from various locations  
100 throughout the Indo-Pacific. We then used a newly developed target gene capture  
101 approach<sup>23</sup> to generate sequence data for ~1000 pre-specified independent orthologous  
102 autosomal regions. This approach allowed us to minimise the sampling of individuals, while  
103 ensuring a comprehensive sampling of loci for a species for which no closely related  
104 reference genome exists. Demographic parameters were estimated in two ways: i) indirectly  
105 by contrasting the gene genealogies at different sampling levels in the metapopulation  
106 (“single deme” vs. “scatter”); ii) directly by applying a non-equilibrium finite island model  
107 to both sampling schemes. We developed an Approximate Bayesian Computation (ABC)  
108 framework<sup>24,25</sup> with recombination to estimate parameters and to compare demographic  
109 models. The site frequency spectrum (SFS) computed on unphased data was used as  
110 summary statistic, thus avoiding the level of uncertainty that is introduced by phasing and  
111 haplotype reconstruction.

112 *Carcharhinus melanopterus* inhabits reef flats and sheltered lagoons<sup>21,22</sup> in the Indian  
113 and Pacific Oceans (the “Indo-Pacific”). While their biology has been widely studied their  
114 population dynamics and dispersal patterns are largely unknown. Nevertheless, insights  
115 into their movements and population health status can be gained through assessments of  
116 their evolutionary history. The species is considered globally near threatened (NT) by the  
117 International Union for Conservation of Nature (IUCN) Red list, with a decreasing  
118 population<sup>26</sup>. *Carcharhinus melanopterus* appears to be locally abundant in many areas but  
119 recent fishing and anthropogenic pressures on reef environments may have affected their  
120 distribution and population dynamics<sup>26-28</sup>. A recent bottleneck was detected in Moorea<sup>29</sup>  
121 suggesting that decreases in effective population size may also have occurred in some parts  
122 of its range. In light of this observation, we used an ABC framework incorporating extensive  
123 simulation to explore the population history of *C. melanopterus*, focusing particularly on  
124 signals in the data that might reflect recent changes in population size. In doing so, we also  
125 use this study system as a test case to explore the extent to which metapopulation structure  
126 can hinder the detection of a recent bottleneck and propose an empirical approach and  
127 sampling scheme that addresses this issue.

128

## 129 **Results**

### 130 *Genetic diversity and data summary*

131 The demographic history of the metapopulation of *C. melanopterus* was examined using two  
132 datasets: the first based on estimates from a “single deme” (SID) in Northern Australia, the  
133 second based on a collection of samples taken from various locations in the Indo-Pacific,  
134 which we refer to as the “scatter” sample (SCD) (see Fig. 1, Table 1 and Supplementary

135 Table 1). We sequenced 18 individuals in total with an average coverage of 75×. After  
136 applying strict filters and removing duplicate reads (see SI), we obtained sequence data for  
137 995 loci for SCD and 998 loci for SID, spanning 606,647 bp and 632,160 bp respectively (Table  
138 1 and Supplementary Table S2). The average length of the regions is ~600bp and details of  
139 the length distribution for SCD and SID are shown in Supplementary Fig. 1. Overall, 2605  
140 and 1946 high quality single nucleotide polymorphisms (SNPs) were called for the scatter  
141 and single deme dataset, respectively. As expected, we detected a higher number of SNPs  
142 from SCD (considering samples from different locations) than SID, and SNP density is  
143 higher in introns than in exons for both datasets (no significant difference was found  
144 between SNP density in intron 5' and intron 3'; Supplementary Table S2). We also performed  
145 a Principal Component Analysis (PCA) including all 18 samples to assess the level of  
146 population structure within our dataset (Supplementary Fig. S2). At least three distinctive  
147 clusters are suggested by the first two principal components, explaining ~40% of the  
148 variance and separating Australia from the Indo-Pacific and Oman samples. Additional  
149 population sub-structure within the Australian and the Indonesian clusters is highlighted by  
150 the third principal component (Supplementary Fig. S2, panel b and d). Overall, this confirms  
151 that the signal in our dataset is incompatible with panmixia and thus a simple demographic  
152 model of a single isolated population is not appropriate to fully describe the demographic  
153 history of these samples.

154

#### 155 *Demographic inferences: indirect approach*

156 First, simple population genetics models were applied to indirectly estimate the  
157 demographic parameters of the metapopulation by contrasting the characteristics of the

158 genealogies under the two sampling schemes, SID and SCD. A constant-size model (model  
159 COS) and a demographic-change model (model CHG1) were initially compared (Fig. 2,  
160 panel a and b). Both models were found to have equal posterior probability (0.5) in SID,  
161 suggesting a pattern compatible with either a weak signal of expansion ( $N_{\text{mod}}$  was slightly  
162 higher than  $N_{\text{anc}}$ , Supplementary Table S3) or a constant population size. This is consistent  
163 with the ancestral versus modern effective population size ratio (resize) computed under the  
164 CHG1 model (median = 0.48, 95% credible interval (CI) ranging from 0.03 to 2.56). In  
165 contrast to these results, model CHG1 showed a posterior probability of 0.89 when tested in  
166 SCD and a 95% CI of the resize between 0.03 and 0.54, suggesting a strong signal of  
167 expansion. This was confirmed when the effective population size was estimated at different  
168 time points in the past with an ABC-skyline reconstruction: a sharp signal of expansion was  
169 detected around ~90,000 generations before present, while a constant-size population was  
170 clearly observed in SID (Fig. 3). Under CHG1 we were able to detect the time of the  
171 expansion of the metapopulation but more recent changes in population size cannot be  
172 excluded *a priori*. Therefore, a model with two demographic changes (model CHG2; Fig. 2,  
173 panel c) was also tested in order to account for possible more recent demographic events  
174 (e.g. post-glacial expansion), as described for other marine species<sup>30,31</sup>. Posterior probabilities  
175 of model CHG1 and model CHG2 are similar for both datasets (Supplementary Table S4).  
176 When the effective population size was estimated at different time points in the past, CHG1  
177 and CHG2 showed the same pattern (Fig. 3 and Supplementary Fig. S3). The estimation of  
178  $T_{\text{cl}}$  in CHG2 for both datasets reflects the estimate of  $T_{\text{c}}$  in CHG1 suggesting that CHG2  
179 identifies only the change in effective population size corresponding to the demographic  
180 expansion that was also identified by CHG1.



181

182 *Demographic inferences: direct approach*

183 Considering the results from the indirect approach, we therefore explored the demographic  
184 signals in the data by fitting a non-equilibrium finite island model<sup>20</sup> (model FIM; Fig. 2,  
185 panel d) with 100 demes to both datasets. The choice of an island model is justified by the  
186 absence of panmixia in the PCA and by the near-uniform  $G_{st}$  matrix (Supplementary Table  
187 S5), suggesting similar genetic distances across all samples except Oman. Model FIM is  
188 defined by three parameters, namely  $Nm$ , the time of the onset of the island  $T_i$  and the  
189 effective size of the ancestral deme,  $N_{anc}$ . Demographic parameters of the metapopulation  
190 were estimated directly for the two different sampling schemes, SCD and SID. The FIM  
191 model showed the highest posterior probability in the model choice for both SID and SCD  
192 (Table 2). Cross-validation of the model choice confirmed that FIM is distinguished from  
193 COS and CHG1 with high probability for both datasets (see SI and Supplementary Table S6).  
194 Importantly, the two datasets produced similar estimates of both  $Nm$  and  $T_i$  (Table 3). We  
195 further confirmed this result by applying FIM to the complete dataset of 18 samples  
196 (SCD+SID without shared samples) (Table 3). With this value of  $Nm \approx 40$  in the  
197 metapopulation, the signature of the ancestral expansion at  $T_i$  is lost in SID but not in SCD,  
198 consistent with expectation based on results in simulation studies of range expansion (see  
199 <sup>19,32,33</sup>). Indeed, for similar  $Nm$  values the gene genealogy of lineages sampled from a single  
200 deme is a mixture of recent coalescent events occurring during the *scattering* phase and more  
201 ancient coalescent events occurring during the *collecting* phase. This generates a gene  
202 genealogy similar to that typical of a constant size population. Conversely, a scatter sample  
203 will show a signature of expansion as most of the coalescent events will occur at the time of

204 the foundation of the metapopulation. Cross-validation of  $Nm$  suggests that the estimation is  
205 reliable and robust, with bias of the mode around -0.02 and -0.01 for SCD and SID  
206 respectively (Supplementary Table 7). We estimated  $T_i$  to have occurred ~59,000 generations  
207 ago (the average between the point estimates for the onset of the island from SCD and SID;  
208 Table 3). We observed an overestimation of the onset of the expansion in CHG1 (as  $T_c$ )  
209 compared to FIM (as  $T_i$ ) in SCD. Cross-validation suggests a more robust and accurate  
210 estimate of  $T_i$  than  $T_c$ , with an associated bias of 0.48 and 1.154 respectively (Supplementary  
211 Table S7).

212

### 213 *Detection of a recent bottleneck*

214 We used ABC to test whether the absence of a bottleneck in our dataset reflects the real  
215 demographic history of *C. melanopterus*, or a lack of power to detect it. To this end, we  
216 simulated pseudo observed data sets (*pods*) under a modified FIM model (FIM-BOTT)  
217 characterised by two additional parameters (Supplementary Fig. S4, panel b):  $T_{\text{bott}}$  (the time  
218 when an instantaneous decrease in  $Nm$  occurred) and  $I_{\text{bott}}$  (the ratio of the ancestral  $Nm$  to  
219 the new one). When  $I_{\text{bott}}=1$  FIM-BOTT reduces to FIM (Fig. 2 panel d). FIM-BOTT is defined  
220 by two major events: the onset of the island at  $T_i$  and the reduction in connectivity (i.e., a  
221 reduction in the effective population size of a deme, a reduction in the migration rate, or  
222 both) at  $T_{\text{bott}}$ . We simulated 1,000 *pods* under model FIM-BOTT for each parameter  
223 combination and we reanalysed them using the CHG2 model. CHG2 allows for two changes  
224 in effective population size through time and it could therefore recover both events of FIM-  
225 BOTT. We mimicked both the SID and the SCD sampling schemes and we tested twelve  
226 combinations of  $I_{\text{bott}}$  and  $T_{\text{bott}}$ , namely two intensities of  $Nm$  reduction (100× and 1000×) at six

227 time points (10, 50, 100, 200 500, 1000 generations ago). In this way, we were able to examine  
228 their respective behaviours when a recent bottleneck (here represented as a decrease in  $Nm$ )  
229 was simulated in order to obtain insight regarding the optimal sampling strategy to detect it.  
230 We plotted for comparison the results obtained by analysing *pods* simulated under FIM. For  
231  $T_{\text{bott}} \leq 50$  generations no signal of the bottleneck was detected for either sampling scheme at  
232 any  $I_{\text{bott}}$  (Fig. 4, Supplementary Fig. S5 and S6). With progressively older  $T_{\text{bott}}$ , we observed a  
233 general reduction of the estimated  $N_e$  when compared to the one estimated from *pods*  
234 simulated under FIM (Fig. 4, Supplementary Fig. S5, S6). This reduction was detected first in  
235 SID and only later (~500 generations ago) in SCD (Supplementary Fig. S5 and S6). However,  
236 a change in  $N_e$  through time (expected under a bottleneck) was never observed for any  
237 combination of  $I_{\text{bott}}$  and  $T_{\text{bott}}$  in SCD (Fig. 4 and Supplementary Fig. 5 and 6). SID was more  
238 affected by the change in connectivity, but a signature of a bottleneck appeared only for  
239  $I_{\text{bott}}=1000\times$  and  $T_{\text{bott}} \geq 200$  (Supplementary Fig.S6). The capacity to detect a bottleneck can  
240 depend both on the real properties of the gene genealogy and on the inferential method  
241 used to analyse the data (the ABC skyline in this case). Therefore, we tested the power of our  
242 ABC-skyline approach with *pods* simulated under an unstructured model with bottleneck  
243 intensities that were comparable to those simulated in the metapopulation scenario.  
244 Specifically, we performed simulations under model CHG1-BOTT (Supplementary Fig. S4,  
245 panel a), an unstructured population with demography estimated under CHG1 (in our SCD  
246 sample) and the same combinations of  $I_{\text{bott}}$  and  $T_{\text{bott}}$  as above. Here, the parameter  $I_{\text{bott}}$  refers  
247 to the decrease in  $N_e$ , while for FIM-BOTT it referred to the decrease in  $Nm$ .  $N_e$  estimated  
248 from *pods* simulated under CHG1-BOTT drops compared to the values estimated from *pods*

249 simulated under CHG1 as recently as 10 generations ago (Fig. 4). Moreover, a clear signature  
250 of a bottleneck appears as soon as  $T_{\text{bott}}=50$  (Fig. 4).

251         Similar to the reasoning followed when studying the real data, we further analysed  
252 the *pods* simulated under FIM-BOTT for all combinations of  $I_{\text{bott}}$ ,  $T_{\text{bott}}$  and sampling scheme  
253 with the FIM model. We plotted the median of the posterior distributions of  $Nm$  estimated  
254 from each *pods* (hereafter,  $Nm_{\text{est}}$ ). To quantify the reduction of  $Nm_{\text{est}}$  due to the simulated  
255 decrease in  $Nm$ , we show as comparison  $Nm_{\text{est}}$  obtained from *pods* simulated under FIM (Fig.  
256 5, Supplementary Fig. S7). First of all, we note that both sampling schemes can correctly  
257 recover  $Nm$  when *pods* are simulated with the FIM model, indicating that this is an  
258 appropriate inferential procedure (Fig. 5). We then observed that the two sampling scheme  
259 respond differently when *pods* are simulated under FIM-BOTT. Generally,  $T_{\text{bott}}$  seems to  
260 have a stronger effect on  $Nm_{\text{est}}$  than does  $I_{\text{bott}}$  (Fig. 5, Supplementary Fig. S7). SCD does not  
261 show any significant reduction in  $Nm_{\text{est}}$  until 500 generations ago, while SID starts showing a  
262 decrease almost immediately, after just 10 generations. The decline of  $Nm_{\text{est}}$  in SID is faster  
263 when  $I_{\text{bott}}=1,000$  than for  $I_{\text{bott}}=100$ . In both cases, the distributions of  $Nm_{\text{est}}$  for SID and SCD up  
264 to 500 generations ago show a significant difference. At 1000 generations, both datasets  
265 show the same pattern with severe decreases in  $Nm_{\text{est}}$  (Fig. 5, Supplementary Fig. S7).

266

## 267 **Discussion**

268

269 In this study we present a novel approach to population genomics that is suitable for  
270 application to non-model organisms, particularly those for which it is difficult to obtain  
271 large sample sizes. The novelty stems from both the technology applied to produce NGS

272 sequence data and the sampling scheme adopted for the population genomics inferences.  
273 First, we used a recently developed target gene capture approach paired with NGS<sup>23</sup> that, so  
274 far, has only been used for phylogenomics inference<sup>34</sup>. Second, we exploit intrinsic  
275 differences in the shape of gene genealogies that result from the *collecting* and *scattering*  
276 phases of metapopulations<sup>16,18,32</sup> to demonstrate that it is possible to make demographic  
277 inferences indirectly based on a few carefully chosen individuals when using a sufficiently  
278 large number of loci. We chose to test the utility of our framework using the black tip reef  
279 shark, *C. melanopterus*, because we felt that this species was a good example of the practical  
280 challenges that are faced by population and conservation geneticists that are working with  
281 non-model systems. Firstly, individuals of this species have a small home range and exhibit  
282 strong site fidelity, making it a good example of a non-model organism that exhibits  
283 metapopulation structure. Indeed, this species has previously been shown to exhibit  
284 extensive population structure and restricted movements in French Polynesia<sup>35-37</sup>, the Great  
285 Barrier Reef<sup>38</sup> and Western Australia<sup>39</sup>. Secondly, they mostly occur in remote regions of the  
286 world and, as is the case for the majority of free ranging marine animals, it is logistically  
287 difficult to sample them in large numbers. Finally, the International Union for the  
288 Conservation of Nature has listed *C. melanopterus* as “near threatened”, meaning that any  
289 information that can be gleaned regarding the demography and structure of this species can  
290 have implications for management. These attributes make *C. melanopterus* a well-suited  
291 system for to test the efficacy of our approach for reconstructing the evolutionary dynamics,  
292 historical demography and associated conservation implications in a non-model species that  
293 has a high degree of metapopulation sub-structure, but from which widespread sampling is  
294 difficult.

295 Our approach derives its effectiveness from the separation of time scales (i.e.,  
296 *scattering vs collecting* phases), first described elegantly by Wakeley (1999), for the gene  
297 genealogies in an island model and later shown to be valid for many metapopulation  
298 models, i.e., stepping stone<sup>18</sup>, spatially continuous<sup>40</sup> and range expansion<sup>19</sup>. Our indirect  
299 approach based on the comparison of the genealogical history at the two sampling levels  
300 appears robust to mis-specification of the metapopulation model, but it cannot provide  
301 precise estimates of the demographic parameters. To further characterise the underlying  
302 demography, we analysed our data directly using a non-equilibrium finite island model.  
303 While other metapopulation models might better fit the data, they come at the risk of  
304 overparameterisation (i.e., non-symmetric island model, spatial models as a stepping stone).  
305 Herein, we demonstrate statistically that even a relatively simple model such as the FIM  
306 provides a better proxy to the data and more realistic description of a species history than  
307 models that ignore population structure (Table 2).

308 The relative length of the *scattering vs collecting* phase determines the shape of the  
309 gene genealogy and is mostly influenced by  $Nm$ <sup>16,19</sup>. This holds true for lineages sampled  
310 within a deme (our SID) and lineages scattered throughout the range of the species (our  
311 SCD). If an expansion occurred in the species through the colonisation of new habitat, high  
312  $Nm$  values will determine a signature of population growth at all sampling levels<sup>18</sup>. For  
313 decreasing  $Nm$ , the signature of expansion is first lost when sampling lineages from a single  
314 deme and then in a scattered sample. We found a significant signature of expansion in SCD  
315 and a constant population size in SID. Ray et al. (2003) suggested that at  $Nm < 50$  the  
316 genealogy in a single deme would mostly resemble that of a constant size population (or  
317 even of a population reducing in size) in a range expansion model. When we fit the FIM

318 model independently to both SCD and SID, we found a metapopulation characterised by a  
319 value of  $Nm \sim 40$  (95% CI: 20-110), with an onset of formation around  $\sim 59,000$  (95% CI: 6,000-  
320 165,000) generations ago. This level of connectivity is consistent with philopatry in this  
321 species, as previously described in Moorea and Tetiaroa (French Polynesia)<sup>35</sup>. Unfortunately  
322 our sampling scheme does not allow us to test males and females separately, but it would be  
323 interesting to investigate possible differences in the level of connectivity related to sex-  
324 specific migration. We further apply the same FIM model to the whole dataset and we  
325 obtained similar values of both  $Nm$  and  $T_i$  (Table 3). In summary, the indirect approach of  
326 comparing gene genealogies under different sampling schemes and directly applying the  
327 FIM model (applied to three largely independent datasets) provided consistent results,  
328 suggesting that this approach is effective for reconstructing the demography of this species.  
329 We stress that even though there is no spatial component in the FIM model, the time of  
330 formation of the metapopulation is analogous to the expansion time in a range expansion  
331 model. Therefore, we speculate that this time estimate probably represents the colonisation  
332 of the Indian Ocean by *C. melanopterus*, through a range expansion. Vignaud et al.<sup>29</sup> found  
333 evidence for genetic structure and isolation by distance at a larger geographic scale (i.e.,  
334 Pacific and Indian Ocean) for this species. Clearly, a FIM model would not be a good  
335 approximation in this case and a non-equilibrium stepping-stone or a range expansion  
336 model might be more appropriate. However, our individuals (with the exception of Oman)  
337 come from a restricted geographic area so that the spatial component of the demographic  
338 model can be neglected. Indeed, we simulated from the posterior distribution of the FIM the  
339 expected  $F_{st}$  between two demes at 14 independent microsatellites loci with the same  
340 mutation rate as in Vignaud et al.<sup>29</sup>. We found the  $F_{st}$  distribution to be compatible with the

341 value they found between East and West Australia, which are more distant than the samples  
342 from our study area. This further suggests that our model is appropriate for our specific  
343 dataset, but we are aware that it might not provide an accurate description of the *C.*  
344 *melanopterus* demography over its whole range.

345         We made some simplifying assumptions when analysing the *C. melanopterus* data.  
346 We used a single step change of effective population size in our indirect approach and a  
347 constant  $Nm$  when fitting the FIM model. Obviously, the real evolutionary histories of  
348 species are likely to be more complex and it may be challenging to distinguish between local  
349 events (such as a bottleneck or expansion in a deme) and changes in connectivity/number of  
350 demes in metapopulations<sup>16,41</sup>. Climate change and anthropogenic activity are reported to  
351 have impacted several marine species, including some sharks<sup>30,42-44</sup>. A recent bottleneck in *C.*  
352 *melanopterus* was identified in Moorea and attributed to human activity<sup>29</sup>. In an effort to  
353 distinguish between patterns that might be caused by metapopulation structure from those  
354 caused by localized bottlenecks we subjected the data to analysis using both SID and SCD.  
355 We did not find any evidence for a more recent event than the metapopulation expansion of  
356 *C. melanopterus* (Supplementary Fig. S3), ruling out the possibility of a demographic change  
357 related to the post-glacial maximum (~20-15 KYA) as has been proposed for other sharks<sup>30</sup>.  
358 The distribution of *C. melanopterus* is confined to reef flats and sheltered lagoons and the  
359 effects of the last glacial maximum appear to have had little impact on this species.  
360 However, recent and mild bottlenecks are more challenging to detect using coalescent  
361 analyses<sup>45,46</sup>. Indeed, many marine species do not show clear signatures of a bottleneck  
362 despite being threatened by overfishing for many generations<sup>47,48</sup>. Nevertheless, meta-  
363 analysis studies have shown general reduction in diversity in overfished species<sup>49</sup>. These



364 issues motivated us to investigate how best to detect a recent reduction in effective size in a  
365 metapopulation. To this end, we performed a simulation study focusing on a  
366 metapopulation with the same demography as that estimated in our *C. melanopterus* data but  
367 experiencing a recent bottleneck. Obviously, a more extensive investigation of parameter  
368 space would be interesting but is beyond the scope of this paper.

369         This simulation study had three goals: i) to better understand the recent  
370 demographic history of *C. melanopterus*; ii) to characterise the behaviour of metapopulations  
371 experiencing recent bottlenecks; iii) to evaluate the relative merits of our different sampling  
372 schemes. Analyses of the simulated data paralleled those adopted for the real data, i.e.,  
373 using the direct and indirect approaches. The indirect approach revealed two important  
374 features: i) SCD fails to detect evidence of a bottleneck, even at high intensities, showing a  
375 pattern that is similar to the no-bottleneck case (Fig. 4); ii) SID similarly does not show  
376 evidence of bottleneck, but it shows a reduction in genetic diversity compared to the no-  
377 bottleneck case at both intensities (100× and 1000×), within just 10 generations. The genetic  
378 consequence of the bottleneck on a SID sample is the reduction in the estimated effective  
379 size compared to the no-bottleneck scenario (Fig. 4, Supplementary Fig. S5 and S6).  
380 However, we could not have detected such a decrease of the effective size without some  
381 baseline reference values, suggesting that it is difficult to assess whether a species is  
382 critically endangered when it is part of a structured metapopulation. This might explain  
383 why many overfished species do not show a genetic signature of bottleneck despite being  
384 threatened.

385         The direct approach confirmed that the two sampling schemes behave differently  
386 after a bottleneck. We computed  $Nm$  using the FIM model and we found, as expected, that a

387 stable metapopulation shows a similar estimate of  $Nm$  under both sampling schemes (Fig. 5  
388 and Supplementary Fig. S7). Conversely, a decrease in the  $Nm$  estimated from SID, but not  
389 from SCD, is observed under a bottleneck scenario (Fig. 5 and Supplementary Fig. S7),  
390 suggesting that the comparison of the two datasets may help detecting recent changes in  
391 effective population size. These results (both the ABC-skyline models and the  $Nm$  estimates)  
392 can be interpreted from a coalescent point of view: a recent bottleneck will produce a burst  
393 of coalescent events only at the deme level (i.e., during the *scattering* phase), having no  
394 impact at all on the *collecting* phase even for high intensity of reduction. A scattered sample,  
395 which does not have the *scattering* phase, will not be affected by recent bottleneck events  
396 while a local single deme sample will. These findings suggest that metapopulations are  
397 more resilient than unstructured populations to recent changes in effective size (or  
398 connectivity), implying that taking population structure into account is crucial when  
399 inferring the demography of a species. Most species are structured, including those that are  
400 endangered. In conservation studies we need to detect changes in effective population size  
401 on the order of tens to, at most, hundreds of generations. Our method can be therefore be  
402 usefully applied in a conservation setting as it is able to detect such recent changes. We  
403 expect that it can be easily applied to both critically endangered (e.g. the daggernose shark)  
404 and commercially exploited (e.g.. the Atlantic cod) species to better design appropriate  
405 conservation management plans. We now envisage exploring the power of our approach  
406 under a wider spectrum of parameters in order to provide guidelines for conservation  
407 studies, but this is beyond the scope of this work. In the case of the *C. melanopterus* data  
408 examined in the current study, the single deme sampled from Northern Australia has not  
409 experienced a recent bottleneck. However, we cannot exclude the possibility that this may

410 have occurred for the other demes of the metapopulation, where conditions may have been  
411 more extreme than those simulated here.

412

413 In summary, we present a recently developed target gene capture approach used  
414 here for the first time to perform inferences at the intra-specific level. By exploiting  
415 theoretical and simulation results on the coalescent history of metapopulations, we show  
416 how few carefully collected specimens can provide information about the demography of a  
417 species when many loci are available. This strategy can minimise sampling effort and  
418 associated cost of data production, making population genomic analysis of non-model  
419 organisms more feasible. We showed that this approach allows refined estimates of  
420 connectivity among demes relative to traditional population genetics approaches and that  
421 the sampling scheme adopted is particularly effective when investigating recent changes in  
422 effective population size and, potentially, migration rates. This opens new avenues for  
423 theoretical developments on the conservation management and recovery of endangered  
424 species.

425

## 426 **Materials and Methods**

### 427 *Sampling, library preparation and sequencing*

428 A total of 18 samples of *C. melanopterus* were included from 8 different locations (Fig. 1):  
429 Northern Territory and Queensland, Australia (N=11), Oman (N=1), Philippines (N=1),  
430 Thailand (N=1), Malaysia (N=1), South Kalimantan, Indonesia (N=1), West Kalimantan,  
431 Indonesian Borneo (N=1) and East Kalimantan, Indonesia (N=1). Samples were divided in  
432 two datasets called “scatter” (SCD) and “single deme” (SID) with 9 and 11 samples

433 respectively (Table 1, Supplementary Table S1). The SCD dataset aims to mimic a “scatter  
434 sample”, sensu Wakeley, where all samples come from independent geographical locations  
435 distributed in close proximity to each other. We also included one sample from Oman in  
436 order to infer the demographic history of the metapopulation at a larger scale and to cover a  
437 more extensive area of the Indian Ocean. Muscle tissue was extracted from dead specimens  
438 collected from local fish markets and then stored in 95% ethanol. Genomic DNA was  
439 extracted using the E.Z.N.A Tissue DNA Kit (Omega Bio-Tek, Inc Norcross, GA) according  
440 to the manufacturer’s instructions. Illumina sequencing libraries (500bp) were prepared and  
441 amplified by PCR prior to two rounds of target gene capture (targeting 1077 autosomal  
442 regions) using a ‘touchdown’ DNA hybridization approach<sup>23</sup>. Resulting enriched libraries  
443 were re-amplified to incorporate a sample specific index, pooled and sequenced paired-end  
444 (250 bp reads) on an Illumina MiSeq benchtop sequencer (Illumina, Inc, San Diego, CA).  
445 Sequence reads associated with each sample were identified and sorted by their respective  
446 indices<sup>23</sup>.

447

#### 448 *De novo reference sequence assembly*

449 Briefly, sequence read data from several individuals was used to build a haploid reference  
450 sequence for the 1077 target exons and associated introns. Adapters and low quality reads  
451 were removed from the raw sequence read data and contigs were assembled *de novo*. On  
452 target material was identified by determining the orthology of assembled contigs to a set of  
453 core orthologs identified across model vertebrates (see SI for details). For each exon and  
454 intron (5’ and 3’) the longest contig across all sequenced individuals was retained and used  
455 to assemble a reference sequence that is 1,293,710 bp including exons and introns (5’ and 3’).

456

457 *Read mapping, variant calling and filtering*

458 A Burrows-Wheeler Aligner (BWA) <sup>50</sup> was used to map reads to the reference sequence  
459 generated by *de novo* assembly <sup>51</sup>. Duplicate read marking was performed with Picard  
460 v.1.129 (<http://broadinstitute.github.io/picard/>), local realignment with the Genome Analysis  
461 ToolKit (GATK) v3.3-0 <sup>52</sup> and genotype calling with samtools v1.1 <sup>53</sup>. Raw variants were  
462 filtered using custom Perl (v5.18.2) and R (3.0.2) scripts (Supplementary Table S8). Filtering  
463 was based on strand bias, minimum depth 6×, removal of triallelic sites, removal of sites  
464 with heterozygous calls in more than 80% of samples and removal of any missing calls in  
465 order to have a dataset without any missing genotypes, reducing background noise and  
466 uncertainty (see SI for details).

467

468 *Descriptive analyses*

469 Principal component analysis (PCA) was performed with the function “prcomp” in the R  
470 environment <sup>54</sup>. A Gst distance matrix<sup>55</sup> was calculated with Arlequin 3.5<sup>56</sup> (see SI for details).

471

472 *Demographic Inference*

473 We developed an ABC <sup>24</sup> framework to estimate parameters and compare demographic  
474 models. The folded site frequency spectrum (SFS) and total number of SNPs were used as  
475 summary statistics, to avoid phasing issues. Mutation and recombination rates were allowed  
476 to vary across loci using hyperprior distributions (see SI for details). Generation time was set  
477 to seven years <sup>36</sup>. Four demographic models were tested for both datasets (Fig. 2). Model  
478 COS represents a constant-size population model described only by the effective population

479 size ( $N$ ) (Fig. 2, panel a). Model CHG1 represents a single instantaneous demographic-  
480 change model occurring at the time  $T_c$  (Fig. 2, panel b).  $N_{anc}$  and  $N_{mod}$  are the ancestral and  
481 modern effective population sizes respectively. Values of the ancestral versus modern  
482 effective population size ratio ( $resize, N_{anc}/N_{mod}$ ) greater than 1 are compatible with a  
483 reduction in effective population size while values lower than 1 suggest a population  
484 expansion. If this ratio is equal to 1, the scenario is compatible with a constant-size  
485 population. Model CHG2 represents a demographic-change model in which two events,  
486 occurring at times  $T_{c1}$  and  $T_{c2}$ , cause changes in population size described by three effective  
487 population sizes ( $N_{anc}$ ,  $N_{int}$  and  $N_{mod}$  for ancestral, intermediate and modern respectively)  
488 (Fig. 2, panel c). Model FIM represents a non-equilibrium finite island model with 100 demes  
489 ( $N_1 \dots N_{100}$ ) described by  $Nm$  as the product between the effective population size ( $N$ ) and the  
490 migration rate ( $m$ ) (Fig. 2, panel d).  $N_{anc}$  is the effective size of the ancestral deme from which  
491 the island originated at the time  $T_i$ . One hundred demes was chosen in order to approximate  
492 the large number of demes that are necessary to describe the coalescent history in  
493 metapopulation models in terms of the *scattering* and *collecting* phases<sup>20</sup>.

494 We generated 100,000 simulations for each demographic model using fastsimcoal2  
495 v2.5.1<sup>57</sup>. Each simulation includes 995 and 998 gene genealogies for SCD and SID  
496 respectively, to be consistent with our real data. Prior distributions are displayed in Table 3,  
497 Supplementary Table S3 and S9. The posterior probabilities of each model were calculated  
498 by a weighted multinomial logistic regression<sup>58</sup> for which we retained the best 25,000  
499 simulations. The parameters of the best-fitting model were estimated from the 5,000  
500 simulations closest to the observed dataset using a local linear regression according to<sup>24</sup>.  
501 Posterior distributions for model CHG1 and FIM are shown in Supplementary Fig. 8 and 9.

502 Both CHG1 and CHG2 models were used to graphically reconstruct the variation of  
503 effective population size through time. To this end, for each combination of parameters  
504 retained by the ABC algorithm (5,000 in our case), we recorded the effective size at specific  
505 time points. The median value of the posterior distribution of the effective size at each time  
506 point was calculated together with the 95% credible interval and plotted against time to  
507 obtain an ABC-skyline reconstruction (Fig. 3, 4, Supplementary Fig. S3, S5 and S6). Time  
508 points were defined by randomly extracting values from an exponential distribution with a  
509 rate calibrated with the upper bound (97.5%) of the estimated mean TMRCA across loci. In  
510 this way all generated time points were not greater than 97.5 % of the estimated mean  
511 TMRCA across loci. Moreover, recent time points (0, 25, 50, 100, 200, 300, 400 and 500  
512 generations ago) were manually added to increase the resolution towards recent events.  
513 Analyses were performed in the R environment<sup>54</sup> with the library *abc*<sup>59</sup>.

514 We performed cross-validation for both model selection and parameter estimation by  
515 randomly generating *pods* from the prior distributions under each model. For each cross-  
516 validation experiment we generated 1000 *pods* and we applied the same inferential  
517 procedure as for the observed data (see SI, Supplementary Fig. S10 and S11). In addition, a  
518 posterior predictive test<sup>60</sup> was carried out to test whether the data can be reproduced under  
519 a specific demographic model. Bayesian p-values computed from the posterior distribution  
520 of the number of polymorphic sites showed that none of the four models in both datasets  
521 could be rejected (SI, Supplementary Fig. S12).

522

523 *Recent Bottleneck*

524 We tested for signatures of a recent population bottleneck in the metapopulation data set for  
525 both sampling schemes. We restricted our ABC analyses to a metapopulation with  
526 demographic parameters consistent with those estimated from the empirical data examined  
527 in this study. We simulated *pods* under a modified FIM model (FIM-BOTT) characterised by  
528 two additional parameters (Supplementary Fig. S4, panel b):  $T_{\text{bott}}$  (the time when an  
529 instantaneous decrease in  $Nm$  occurred) and  $I_{\text{bott}}$  (the ratio of the ancestral  $Nm$  to the new  
530 one). When  $I_{\text{bott}}=1$  FIM-BOTT reduces to FIM (Fig. 2, panel d). We tested twelve  
531 combinations of parameters, namely two  $I_{\text{bott}}$  ( $100\times$  and  $1000\times$ ) and six  $T_{\text{bott}}$  (10, 50, 100, 200,  
532 500 and 1000 generations ago). For each combination of parameters, we simulated 1000 *pods*  
533 for both SCD and SID (Supplementary Fig. S4, panel b). To further understand the effect of  
534 metapopulation structure on bottlenecks, we performed additional simulations of an  
535 unstructured population under a modified CHG1 model (CHG1-BOTT, Supplementary Fig.  
536 S4, panel a). In this case, *pods* were simulated with demographic parameters estimated in our  
537 real SCD data under model CHG1, to which we added a recent bottleneck characterised by  
538  $I_{\text{bott}}$  and  $T_{\text{bott}}$ . Note that here  $I_{\text{bott}}$  represents the ratio between the ancestral effective  
539 population size  $N_e$  and the new one (while in FIM-BOTT it represents the ratio of the  
540 ancestral  $Nm$  to the new one). We tested the same twelve parameters combinations of  $I_{\text{bott}}$   
541 and  $T_{\text{bott}}$  that we previously used when simulating FIM-BOTT. CHG1-BOTT reduces to  
542 CHG1 when  $I_{\text{bott}}=1$ . All *pods* simulated under both FIM-BOTT (for both sampling schemes)  
543 and CHG1-BOTT were analysed using the ABC-skyline produced by the CHG2 model  
544 (Fig.2, panel c). We applied the same settings used for the real data and for each  
545 combination of parameters we plotted the average of the  $N_e$  through time across the 1,000  
546 *pods* (see SI). All bottleneck scenarios were compared to the ABC-skyline reconstructed from



547 *pods* simulated under FIM or CHG1. Finally, *pods* simulated under FIM-BOTT were also  
548 analysed using FIM to estimate  $Nm$ . We compared these values to those estimated from *pods*  
549 generated under FIM.

550

## 551 References

- 552 1 Nadachowska-Brzyska, K. *et al.* Demographic divergence history of pied flycatcher and  
553 collared flycatcher inferred from whole-genome re-sequencing data. *PLoS Genet* **9**,  
554 e1003942, (2013).
- 555 2 Romiguier, J. *et al.* Comparative population genomics in animals uncovers the determinants  
556 of genetic diversity. *Nature* **515**, 261-263, (2014).
- 557 3 Emerson, K. J. *et al.* Resolving postglacial phylogeography using high-throughput sequencing.  
558 *Proc Natl Acad Sci U S A* **107**, 16196-16200, (2010).
- 559 4 Li, S. & Jakobsson, M. Estimating demographic parameters from large-scale population  
560 genomic data using Approximate Bayesian Computation. *BMC Genet* **13**, 22, (2012).
- 561 5 Roux, J., Rosikiewicz, M. & Robinson-Rechavi, M. What to compare and how: Comparative  
562 transcriptomics for Evo-Devo. *Journal of Experimental Zoology Part B: Molecular and*  
563 *Developmental Evolution*, (2015).
- 564 6 Arnold, B., Corbett-Detig, R. B., Hartl, D. & Bomblies, K. RADseq underestimates diversity and  
565 introduces genealogical biases due to nonrandom haplotype sampling. *Mol Ecol* **22**, 3179-  
566 3190, (2013).
- 567 7 Huang, H. & Knowles, L. L. Unforeseen Consequences of Excluding Missing Data from Next-  
568 Generation Sequences: Simulation Study of RAD Sequences. *Syst Biol*, (2014).
- 569 8 Leache, A. D. *et al.* Phylogenomics of Phrynosomatid Lizards: Conflicting Signals from  
570 Sequence Capture versus Restriction Site Associated DNA Sequencing. *Genome Biol Evol* **7**,  
571 706-719, (2015).
- 572 9 Jones, M. R. & Good, J. M. Targeted capture in evolutionary and ecological genomics. *Mol*  
573 *Ecol*, (2015).
- 574 10 Eriksson, A. & Manica, A. The doubly conditioned frequency spectrum does not distinguish  
575 between ancient population structure and hybridization. *Mol Biol Evol* **31**, 1618-1621,  
576 (2014).
- 577 11 Peter, B. M., Wegmann, D. & Excoffier, L. Distinguishing between population bottleneck and  
578 population subdivision by a Bayesian model choice procedure. *Mol Ecol* **19**, 4648-4660,  
579 (2010).
- 580 12 Heller, R., Chikhi, L. & Siegmund, H. R. The confounding effect of population structure on  
581 Bayesian skyline plot inferences of demographic history. *PLoS One* **8**, e62992, (2013).
- 582 13 Chikhi, L., Sousa, V. C., Luisi, P., Goossens, B. & Beaumont, M. A. The confounding effects of  
583 population structure, genetic diversity and the sampling scheme on the detection and  
584 quantification of population size changes. *Genetics* **186**, 983-995, (2010).
- 585 14 Currat, M. & Excoffier, L. Strong reproductive isolation between humans and Neanderthals  
586 inferred from observed patterns of introgression. *Proc Natl Acad Sci U S A* **108**, 15129-  
587 15134, (2011).
- 588 15 Francois, O., Blum, M. G., Jakobsson, M. & Rosenberg, N. A. Demographic history of  
589 european populations of *Arabidopsis thaliana*. *PLoS Genet* **4**, e1000075, (2008).

- 590 16 Wakeley, J. Nonequilibrium migration in human history. *Genetics* **153**, 1863-1871, (1999).
- 591 17 Wakeley, J. The coalescent in an island model of population subdivision with variation  
592 among demes. *Theor Popul Biol* **59**, 133-144, (2001).
- 593 18 Stadler, T., Haubold, B., Merino, C., Stephan, W. & Pfaffelhuber, P. The impact of sampling  
594 schemes on the site frequency spectrum in nonequilibrium subdivided populations. *Genetics*  
595 **182**, 205-216, (2009).
- 596 19 Ray, N., Currat, M. & Excoffier, L. Intra-deme molecular diversity in spatially expanding  
597 populations. *Mol Biol Evol* **20**, 76-86, (2003).
- 598 20 Wakeley, J. Segregating sites in Wright's island model. *Theor Popul Biol* **53**, 166-174, (1998).
- 599 21 Papastamatiou, Y. P., Lowe, C. G., Caselle, J. E. & Friedlander, A. M. Scale-dependent effects  
600 of habitat on movements and path structure of reef sharks at a predator-dominated atoll.  
601 *Ecology* **90**, 996-1008, (2009).
- 602 22 Papastamatiou, Y. P., Friedlander, A. M., Caselle, J. E. & Lowe, C. G. Long-term movement  
603 patterns and trophic ecology of blacktip reef sharks (*Carcharhinus melanopterus*) at Palmyra  
604 Atoll. *J Exp Mar Biol Ecol* **386**, 94-102, (2010).
- 605 23 Li, C., Hofreiter, M., Straube, N., Corrigan, S. & Naylor, G. J. Capturing protein-coding genes  
606 across highly divergent species. *Biotechniques* **54**, 321-326, (2013).
- 607 24 Beaumont, M. A., Zhang, W. & Balding, D. J. Approximate Bayesian computation in  
608 population genetics. *Genetics* **162**, 2025-2035, (2002).
- 609 25 Bertorelle, G., Benazzo, A. & Mona, S. ABC as a flexible framework to estimate demography  
610 over space and time: some cons, many pros. *Mol Ecol* **19**, 2609-2625, (2010).
- 611 26 Heupel, M. *Carcharhinus melanopterus*, <[www.iucnredlist.org](http://www.iucnredlist.org)> (2009).
- 612 27 Field, I. C. *et al.* Changes in size distributions of commercially exploited sharks over 25 years  
613 in northern Australia using a Bayesian approach. *Fish Res* **125**, 262-271, (2012).
- 614 28 Henderson, A., Al-Oufi, H. & McIlwain, J. Survey, status and utilization of the elasmobranch  
615 fishery resources of the Sultanate of Oman. (Sultan Qaboos University, Muscat, 2007).
- 616 29 Vignaud, T. M. *et al.* Blacktip reef sharks, *Carcharhinus melanopterus*, have high genetic  
617 structure and varying demographic histories in their Indo-Pacific range. *Mol Ecol* **23**, 5193-  
618 5207, (2014).
- 619 30 Portnoy, D. S. *et al.* Contemporary population structure and post-glacial genetic demography  
620 in a migratory marine species, the blacknose shark, *Carcharhinus acronotus*. *Mol Ecol* **23**,  
621 5480-5495, (2014).
- 622 31 Marko, P. B. *et al.* The 'Expansion-Contraction' model of Pleistocene biogeography: rocky  
623 shores suffer a sea change? *Mol Ecol* **19**, 146-169, (2010).
- 624 32 Mona, S., Ray, N., Arenas, M. & Excoffier, L. Genetic consequences of habitat fragmentation  
625 during a range expansion. *Heredity (Edinb)* **112**, 291-299, (2014).
- 626 33 Wegmann, D., Currat, M. & Excoffier, L. Molecular diversity after a range expansion in  
627 heterogeneous environments. *Genetics* **174**, 2009-2020, (2006).
- 628 34 Li, C. *et al.* DNA capture reveals transoceanic gene flow in endangered river sharks. *Proc Natl*  
629 *Acad Sci U S A* **112**, 13302-13307, (2015).
- 630 35 Mourier, J. & Planes, S. Direct genetic evidence for reproductive philopatry and associated  
631 fine-scale migrations in female blacktip reef sharks (*Carcharhinus melanopterus*) in French  
632 Polynesia. *Mol Ecol* **22**, 201-214, (2013).
- 633 36 Mourier, J., Mills, S. C. & Planes, S. Population structure, spatial distribution and life-history  
634 traits of blacktip reef sharks *Carcharhinus melanopterus*. *J Fish Biol* **82**, 979-993, (2013).
- 635 37 Vignaud, T., Clua, E., Mourier, J., Maynard, J. & Planes, S. Microsatellite analyses of blacktip  
636 reef sharks (*Carcharhinus melanopterus*) in a fragmented environment show structured  
637 clusters. *PLoS One* **8**, e61067, (2013).

- 638 38 Chin, A., Tobin, A. J., Heupel, M. R. & Simpfendorfer, C. A. Population structure and  
639 residency patterns of the blacktip reef shark *Carcharhinus melanopterus* in turbid coastal  
640 environments. *J Fish Biol* **82**, 1192-1210, (2013).
- 641 39 Speed, C. W. *et al.* Spatial and temporal movement patterns of a multi-species coastal reef  
642 shark aggregation. *Mar Ecol Prog Ser* **429**, 261-U618, (2011).
- 643 40 Wilkins, J. F. A separation-of-timescales approach to the coalescent in a continuous  
644 population. *Genetics* **168**, 2227-2244, (2004).
- 645 41 Mazet, O., Rodriguez, W. & Chikhi, L. Demographic inference using genetic data from a single  
646 individual: Separating population size variation from population structure. *Theor Popul Biol*  
647 **104**, 46-58, (2015).
- 648 42 Hernández, S. *et al.* Demographic history and the South Pacific dispersal barrier for school  
649 shark (*Galeorhinus galeus*) inferred by mitochondrial DNA and microsatellite DNA mark. *Fish*  
650 *Res* **167**, 132-142, (2015).
- 651 43 Vignaud, T. M. *et al.* Genetic structure of populations of whale sharks among ocean basins  
652 and evidence for their historic rise and recent decline. *Mol Ecol* **23**, 2590-2601, (2014).
- 653 44 O'Leary, S. J. *et al.* Genetic Diversity of White Sharks, *Carcharodon carcharias*, in the  
654 Northwest Atlantic and Southern Africa. *Journal of Heredity*, (2015).
- 655 45 Girod, C., Vitalis, R., Leblois, R. & Freville, H. Inferring population decline and expansion from  
656 microsatellite data: a simulation-based evaluation of the Msvar method. *Genetics* **188**, 165-  
657 179, (2011).
- 658 46 Roman, J. & Palumbi, S. R. Whales before whaling in the North Atlantic. *Science* **301**, 508-  
659 510, (2003).
- 660 47 Riccioni, G. *et al.* Spatio-temporal population structuring and genetic diversity retention in  
661 depleted Atlantic Bluefin tuna of the Mediterranean Sea. *P Natl Acad Sci USA* **107**, 2102-  
662 2107, (2010).
- 663 48 Marra, A., Mona, S., Sa, R. M., D'Onghia, G. & Maiorano, P. Population Genetic History of  
664 *Aristeus antennatus* (Crustacea: Decapoda) in the Western and Central Mediterranean Sea.  
665 *PLoS One* **10**, e0117272, (2015).
- 666 49 Pinsky, M. L. & Palumbi, S. R. Meta-analysis reveals lower genetic diversity in overfished  
667 populations. *Mol Ecol* **23**, 29-39, (2014).
- 668 50 Li, H. & Durbin, R. Fast and accurate short read alignment with Burrows-Wheeler transform.  
669 *Bioinformatics* **25**, 1754-1760, (2009).
- 670 51 Birol, I. *et al.* De novo transcriptome assembly with ABySS. *Bioinformatics* **25**, 2872-2877,  
671 (2009).
- 672 52 McKenna, A. *et al.* The Genome Analysis Toolkit: a MapReduce framework for analyzing  
673 next-generation DNA sequencing data. *Genome Res* **20**, 1297-1303, (2010).
- 674 53 Li, H. A statistical framework for SNP calling, mutation discovery, association mapping and  
675 population genetical parameter estimation from sequencing data. *Bioinformatics* **27**, 2987-  
676 2993, (2011).
- 677 54 R: A Language and Environment for Statistical Computing (R Foundation for Statistical  
678 Computing, 2014).
- 679 55 Nei, M. Analysis of gene diversity in subdivided populations. *Proc Natl Acad Sci U S A* **70**,  
680 3321-3323, (1973).
- 681 56 Excoffier, L. & Lischer, H. E. Arlequin suite ver 3.5: a new series of programs to perform  
682 population genetics analyses under Linux and Windows. *Mol Ecol Resour* **10**, 564-567,  
683 (2010).
- 684 57 Excoffier, L., Dupanloup, I., Huerta-Sanchez, E., Sousa, V. C. & Foll, M. Robust demographic  
685 inference from genomic and SNP data. *PLoS Genet* **9**, e1003905, (2013).
- 686 58 Beaumont, M. A. in *Simulation, Genetics, and Human Prehistory* 135-154 (McDonald  
687 Institute for Archaeological Research, 2008).

688 59 Csillery, K., Francois, O. & Blum, M. G. B. abc: an R package for approximate Bayesian  
689 computation (ABC). *Methods Ecol Evol* **3**, 475-479, (2012).  
690 60 Gelman, A., Carlin, J., Stern, H. & Rubin, D. *Bayesian Data Analysis*. (CRC Press, 2004).

691

## 692 **Acknowledgments**

693 The authors thank Giorgio Bertorelle and Oscar Lao for helpful comments and suggestions  
694 and Laurent Excoffier for sharing fastsimcoal v2.5.2 before publication. Data analysis was  
695 performed on the computer cluster Genotoul bioinformatics platform  
696 ([www.bioinfo.genotoul.fr](http://www.bioinfo.genotoul.fr)). This work was supported by the Agence Nationale de la  
697 Recherche (ANR-12-BSV7-0012 to P.M.D.) and by the US National Science Foundation (DEB-  
698 1132229).

699

## 700 **Author Contributions**

701 S.M., S.P. and G.N. designed research; M.H, C.L. and S.C. contributed with new reagents  
702 and analytical tools; P.M.D., S.C., S.M. and G.N. performed research; P.M.D. and S.M.  
703 analysed data; M.V. gave comments on the manuscript and project; P.M.D., S.C., S.M and  
704 G.N. wrote the paper.

705

## 706 **Competing interests**

707 The authors declare no competing financial interests.

708

## 709 **Data accessibility**

710 A vcf file containing all variants used in this study is being submitted to the Dryad database

711 (<http://datadryad.org/>).

712

713 **Fig. 1: Sampling locations with sample size.** Samples in blue were included in the scatter  
714 dataset (SCD, 9 samples). Samples in orange were considered for the single deme dataset  
715 (SID, 11 samples). Map of sampling locations was generated with the library “rworldmap”  
716 with R software (v3.0.2, <https://cran.r-project.org/>)<sup>54</sup>.

717 **Fig. 2: Demographic models tested for both sampling schemes.** a) COS, constant-size  
718 model; b) CHG1, demographic-change model (one demographic change); c) CHG2,  
719 demographic-change model (two demographic changes); d) FIM, non-equilibrium finite  
720 island model.  $N_{\text{mod}}$ : modern effective population size;  $N_{\text{anc}}$ : ancestral effective population  
721 size;  $T_c$ ,  $T_{c1}$  and  $T_{c2}$ : time of the demographic change (in generations);  $T_i$ : time of the onset of  
722 the island (in generations).

723 **Fig. 3: Skyline reconstruction of the effective population size through time.** a) single deme  
724 (SID, in orange); b) scatter (SCD, in blue). Both skylines were reconstructed up to the mode  
725 of the mean TMRCA across loci. Median values are shown (darker lines) with the 95% high  
726 posterior density interval (lighter lines).

727 **Fig. 4: Average skyline reconstruction under model CHG2 of pseudo-observed data sets**  
728 **(pods) simulated with model FIM and FIM-BOTT in a metapopulation (for SCD and SID)**  
729 **and in an unstructured population (model CHG1 and CHG1-BOTT).** Data were simulated  
730 with  $I_{\text{bott}}=1000$  at: a)  $T_{\text{bott}}=10$  generations; b)  $T_{\text{bott}}=50$  generations; c)  $T_{\text{bott}}=100$  generations  
731 before present. An average skyline reconstruction is shown across 1000 simulations. Solid  
732 lines: scenario with bottleneck (model FIM-BOTT and CHG1-BOTT); dashed line: scenario  
733 without bottleneck (model FIM and CHG1). Median values are shown (darker lines) with  
734 the 95% high posterior density interval (lighter lines).

735 **Fig. 5: Distribution of the median of  $Nm$  estimated under model FIM from pseudo-**  
736 **observed data sets (pods) generated with FIM-BOTT and FIM.** Data were simulated for  
737 both sampling schemes with  $I_{\text{bott}}=100$  and various  $T_{\text{bott}}$ (10, 50, 100, 200, 500 and 1000  
738 generations ago). Dotted lines represent the value of  $Nm$  used to simulate pods under FIM  
739 model.

740

741

742

743

744

745 **Table 1: summary of the “scatter” (SCD) and “single deme” (SID) dataset.**

| Dataset | No. of samples | No. of regions | Bp sequenced | No. of SNPs | SNP density region (kb) |
|---------|----------------|----------------|--------------|-------------|-------------------------|
| SCD     | 9              | 995            | 606,647      | 2605        | 4.3                     |
| SID     | 11             | 998            | 632,160      | 1946        | 3.1                     |

746

747 **Table 2: models posterior probability calculated as in <sup>58</sup> using the closest 25,000**  
748 **simulations. SCD: scatter dataset; SID: single deme dataset.**

749

| Dataset | COS  | CHG1 | FIM  |
|---------|------|------|------|
| SCD     | 0.00 | 0.40 | 0.60 |
| SID     | 0.24 | 0.31 | 0.45 |

750

751

752

753

754

755

756

757

758

759

760

761

762

763

764

765

766

767

768

769

770

771

772

773 **Table 3: parameter estimation under the finite island model (FIM).**  $N_{anc}$ : effective  
 774 population size of the ancestral deme;  $T_i$ : time of the onset of the island (in generations);  $Nm$ :  
 775 product of the effective population size  $N$  and the migration rate  $m$  for each deme; SCD:  
 776 scatter dataset (9 individuals); SID: single deme dataset (11 individuals); pooled dataset:  
 777 SCD+SID without shared samples (18 individuals).  
 778

| Model FIM             | Median | Mode   | 0.025 <sup>a</sup> | 0.975 <sup>a</sup> | Prior <sup>b</sup> |
|-----------------------|--------|--------|--------------------|--------------------|--------------------|
| <b>SCD</b>            |        |        |                    |                    |                    |
| $N_{anc}$             | 33,567 | 42,704 | 1604               | 62,242             | U: 100-100,000     |
| $T_i$                 | 72,760 | 56,354 | 24,124             | 141,628            | U: 100-200,000     |
| $Nm$                  | 52.85  | 47.17  | 38.80              | 109.77             | U: 0.05-250        |
| <b>SID</b>            |        |        |                    |                    |                    |
| $N_{anc}$             | 31,016 | 30,737 | 1571               | 86,026             | U: 100-100,000     |
| $T_i$                 | 63,431 | 61,671 | 6095               | 163,634            | U: 100-200,000     |
| $Nm$                  | 42.04  | 38.61  | 28.51              | 117.80             | U: 0.05-250        |
| <b>Pooled dataset</b> |        |        |                    |                    |                    |
| $N_{anc}$             | 52,541 | 58,148 | 8176               | 84,492             | U: 100-100,000     |
| $T_i$                 | 65,004 | 18,329 | 4255               | 176,692            | U: 100-200,000     |
| $Nm$                  | 58.7   | 51.4   | 38.3               | 150.9              | U: 0.05-250        |

779 <sup>a</sup>Upper and lower limits of the 95% credible interval about the estimated mode.

780 <sup>b</sup>U, uniform probability, in the range of the two values.





a) Model COS

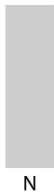

b) Model CHG1

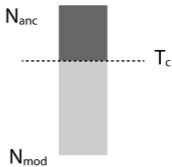

c) Model CHG2

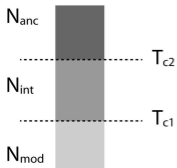

d) Model FIM

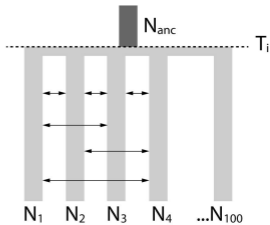

## Deme - SID

a)

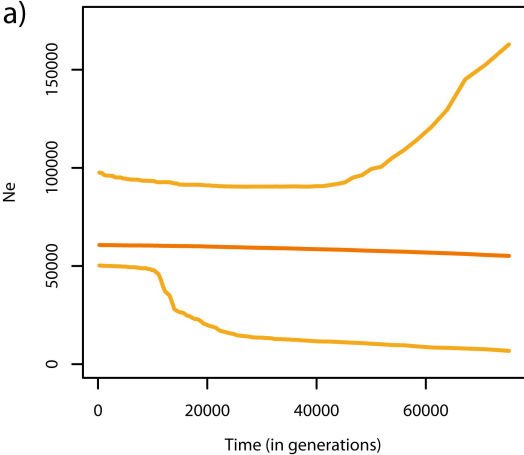

## Scatter - SCD

b)

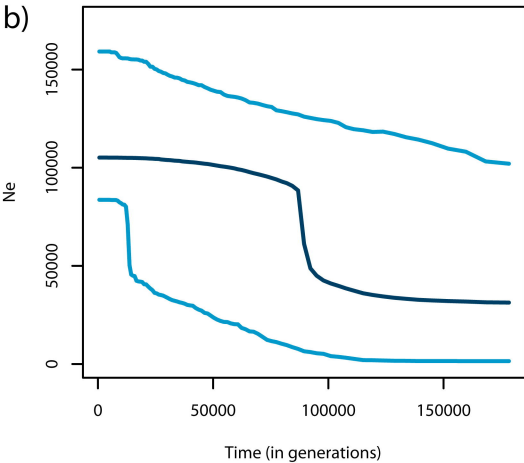

Metapopulation

Unstructured population

Scatter - SCD

Deme - SID

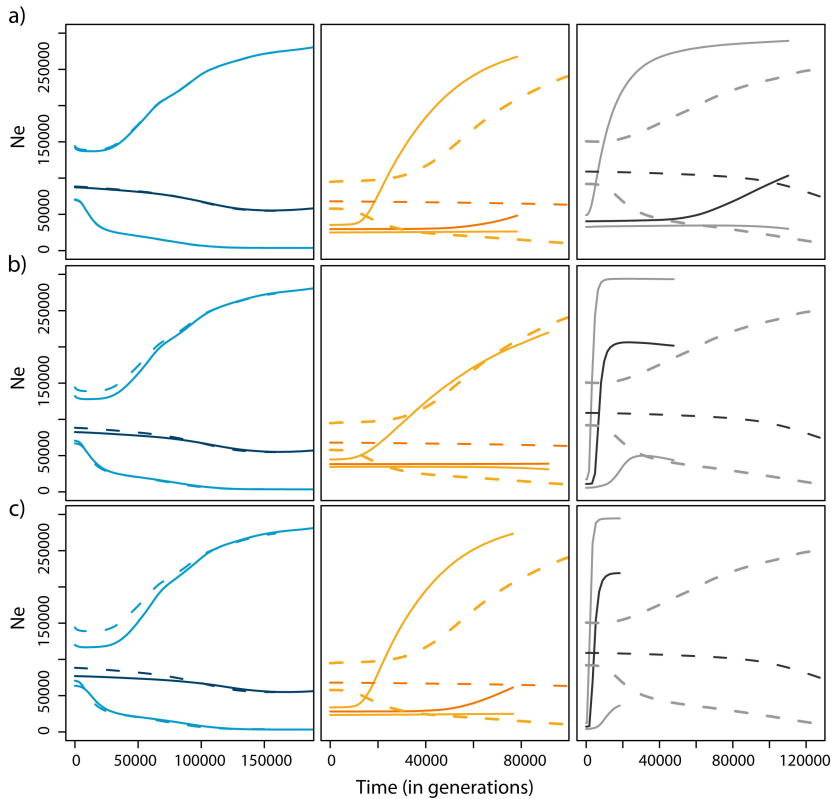

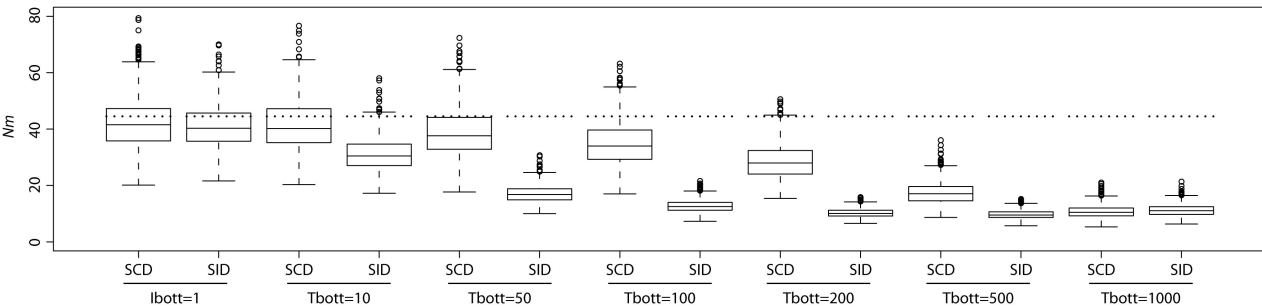

Source: http://biorxiv.org/content/10.1101/068106v1.full.pdf
